# Supplementary material for: Scoping review of guidance on cessation interventions for electronic cigarettes and dual electronic and combustible cigarettes use
Source: PubMed Central journal article supplement — CMAJ Open. 2023 Apr 18;11(2):E336–44. doi: 10.9778/cmajo.20210325 (PMC10118292; doi:10.9778/cmajo.20210325), 2023-04-18
Supplement: open-2021-0325-1-at.pdf [file open-2021-0325-1-at.pdf]

Scoping review of guidance on cessation interventions for electronic cigarettes and dual electronic and combustible cigarettes use.

**Appendix 1: Search Strategy**

Research question: What are the current guidance or recommendations for cessation interventions for e-cigarette users and dual combustible and e-cigarette users tailored to adolescents, youth and adults?

Inclusion criteria:

1. Clinical practice guidance or recommendations of vaping cessation for e-cigarette users and complete cessation of cigarettes and e-cigarettes for dual users targeting adolescents or youth or adults
2. Experimental studies including randomized controlled trials, case reports or case series on vaping or dual use cessation
3. Systematic review or meta-analysis on vaping or dual use cessation interventions
4. Brief reports, commentaries or letters on vaping or dual use cessation interventions

Exclusion criteria:

1. Not in English, animal studies, not published in last 11 years
2. Study protocols
3. Focused on smoking cessation
4. Articles on harm reduction potential of e-cigarette
5. Articles on cannabis vaping
6. Management of EVALI

MEDLINE:

Date: 03.08.2021

| Search type                 | Search terms                                                                                                                                                                                                       | Results |
|-----------------------------|--------------------------------------------------------------------------------------------------------------------------------------------------------------------------------------------------------------------|---------|
| MeSH                        | 1. exp Vaping/ or exp Electronic Nicotine Delivery Systems/                                                                                                                                                        | 5487    |
| Title, abstract and keyword | 2. ((e-cig* or electronic cigarette or nicotine or vaping or vape or vaporizer* or device* or product* or e-liquid* or ENDS) adj3 (cessation or quit* or stop* or intervention or management or treatment)).tw,kf. | 25510   |
| Title, abstract and keyword | 3. ((e-cigarette* or electronic cigarette or e-cig* or ENDS or cigarette* or smok*) adj3 (dual use* or concurrent use* or co-use*)).tw,kf.                                                                         | 596     |
| MeSH                        | 4. exp Adult/                                                                                                                                                                                                      | 7540735 |
| MeSH                        | 5. exp Young Adult/ or exp Adolescent/                                                                                                                                                                             | 2542624 |
| Title, abstract and keyword | 6. (adult* or adolescen* or teen* or youth* or young adult*).tw,kf.                                                                                                                                                | 1662137 |
| MeSH                        | 7. exp Guideline/ or exp Practice Guideline/                                                                                                                                                                       | 36011   |
| Title, abstract and keyword | 8. ((clinical or practice or practitioner* or health or care) adj3 (guideline* or guidance)).tw,kf.                                                                                                                | 77205   |
|                             | 9. 1 or 2 or 3                                                                                                                                                                                                     | 30668   |
|                             | 10. 4 or 5 or 6                                                                                                                                                                                                    | 8887356 |
|                             | 11. 7 or 8                                                                                                                                                                                                         | 106473  |
|                             | 12. 9 and 10 and 11                                                                                                                                                                                                | 90      |
|                             | 13. limit 12 to (english language and humans)                                                                                                                                                                      | 78      |
|                             | 14. limit 13 to yr="2010 -Current"                                                                                                                                                                                 | 55      |

Scoping review of guidance on cessation interventions for electronic cigarettes and dual electronic and combustible cigarettes use.

EMBASE:

Date: 03.08.2021

| Search type                 | Search terms                                                                                                                                                                                                       | Results  |
|-----------------------------|--------------------------------------------------------------------------------------------------------------------------------------------------------------------------------------------------------------------|----------|
| Subject headings/Emtree     | 1. exp electronic cigarette/ or exp vaping/                                                                                                                                                                        | 9769     |
| Title, abstract and keyword | 2. ((e-cig* or electronic cigarette or nicotine or vaping or vape or vaporizer* or device* or product* or e-liquid* or ENDS) adj3 (cessation or quit* or stop* or intervention or management or treatment)).tw,kw. | 36112    |
| Title, abstract and keyword | 3. ((e-cigarette* or electronic cigarette or e-cig* or ENDS or cigarette* or smok*) adj3 (dual use* or concurrent use* or co-use*)).tw,kw.                                                                         | 654      |
| Subject headings/Emtree     | 4. exp adult/ or exp young adult/                                                                                                                                                                                  | 9661217  |
| Subject headings/Emtree     | 5. exp adolescent/                                                                                                                                                                                                 | 1745200  |
| Title, abstract and keyword | 6. (adult* or adolescen* or teen* or youth* or young adult*).tw,kw.                                                                                                                                                | 2245139  |
| Subject headings/Emtree     | 7. exp practice guideline/                                                                                                                                                                                         | 605388   |
| Title, abstract and keyword | 8. ((clinical or practice or practitioner* or health or care) adj3 (guideline* or guidance)).tw,kw.                                                                                                                | 113128   |
|                             | 9. 1 or 2 or 3                                                                                                                                                                                                     | 45064    |
|                             | 10. 4 or 5 or 6                                                                                                                                                                                                    | 11009529 |
|                             | 11. 7 or 8                                                                                                                                                                                                         | 655078   |
|                             | 12. 9 and 10 and 11                                                                                                                                                                                                | 550      |
|                             | 13. limit 12 to (human and english language)                                                                                                                                                                       | 525      |
|                             | 14. limit 13 to yr="2010 -Current"                                                                                                                                                                                 | 459      |

Scoping review of guidance on cessation interventions for electronic cigarettes and dual electronic and combustible cigarettes use.

PsycINFO:

Date: 03.08.2021

| Search type                 | Search terms                                                                                                                                                                                                    | Results |
|-----------------------------|-----------------------------------------------------------------------------------------------------------------------------------------------------------------------------------------------------------------|---------|
| Subject headings            | 1. exp Electronic Cigarettes/                                                                                                                                                                                   | 1884    |
| Title, abstract and keyword | 2. ((e-cig* or electronic cigarette or nicotine or vaping or vape or vaporizer* or device* or product* or e-liquid* or ENDS) adj3 (cessation or quit* or stop* or intervention or management or treatment)).mp. | 4832    |
| Title, abstract and keyword | 3. ((e-cigarette* or electronic cigarette or e-cig* or ENDS or cigarette* or smok*) adj3 (dual use* or concurrent use* or co-use*)).mp.                                                                         | 351     |
| Subject headings            | 4. exp Human Males/                                                                                                                                                                                             | 45199   |
| Subject headings            | 5. exp Human Females/                                                                                                                                                                                           | 150226  |
| Subject headings            | 6. exp Adolescent Behavior/                                                                                                                                                                                     | 2535    |
| Subject headings            | 7. exp Emerging Adulthood/                                                                                                                                                                                      | 4144    |
| Title, abstract and keyword | 8. (adult* or adolescen* or teen* or youth* or young adult*).mp.                                                                                                                                                | 1285184 |
| Subject headings            | 9. exp Treatment Guidelines/ or exp Evidence Based Practice/                                                                                                                                                    | 25864   |
| Subject headings            | 10. exp clinical practice/                                                                                                                                                                                      | 21775   |
| Title, abstract and keyword | 11. ((clinical or practice or practitioner* or health or care) adj3 (guideline* or guidance)).mp.                                                                                                               | 15888   |
|                             | 12. 1 or 2 or 3                                                                                                                                                                                                 | 6575    |
|                             | 13. 4 or 5 or 6 or 7 or 8                                                                                                                                                                                       | 1401467 |
|                             | 14. 9 or 10 or 11                                                                                                                                                                                               | 58025   |
|                             | 15. 12 and 13 and 14                                                                                                                                                                                            | 43      |
|                             | 16. limit 15 to (human and english language)                                                                                                                                                                    | 41      |
|                             | 17. limit 16 to yr="2010 -Current"                                                                                                                                                                              | 32      |

Scoping review of guidance on cessation interventions for electronic cigarettes and dual electronic and combustible cigarettes use.

**Grey literature search:**

Google advanced search:

| Date       | Search terms                                                                                                                            | Results |
|------------|-----------------------------------------------------------------------------------------------------------------------------------------|---------|
| 31.05.2021 | 1. allintext: vaping cessation guidelines site:.gov filetype:pdf (filter: Jan 1, 2010- May 31, 2021)                                    | 838     |
| 31.05.2021 | 2. allintext: vaping cessation guidelines site:.org filetype:pdf (filter: Jan 1, 2010- May 31, 2021)                                    | 2330    |
| 31.05.2021 | 3. allintext: vaping cessation guidelines site:.edu filetype:pdf (filter: Jan 1, 2010- May 31, 2021)                                    | 770     |
| 31.05.2021 | 4. allintext: How to help quit vaping site:.gov filetype:pdf (filter: Jan 1, 2010- May 31, 2021)                                        | 1410    |
| 31.05.2021 | 5. allintext: How to help quit vaping site:.org filetype:pdf (filter: Jan 1, 2010- May 31, 2021)                                        | 3020    |
| 31.05.2021 | 6. allintext: How to help quit vaping site:.edu filetype:pdf (filter: Jan 1, 2010- May 31, 2021)                                        | 926     |
| 03.08.21   | 7. allintext: tobacco cessation for dual users of e-cigarette and cigarette site:.gov filetype:pdf (filter: Jan 1, 2010- July 28, 2021) | 418     |
| 03.08.21   | 8. allintext: tobacco cessation for dual users of e-cigarette and cigarette site:.org filetype:pdf (filter: Jan 1, 2010- July 28, 2021) | 1620    |
| 03.08.21   | 9. allintext: tobacco cessation for dual users of e-cigarette and cigarette site:.edu filetype:pdf (filter: Jan 1, 2010- July 28, 2021) | 434     |

Grey databases:

Date: 28.05.2021

Keywords: vaping, e-cigarette, electronic cigarette

| Database                                                          | Results | Post-screening |
|-------------------------------------------------------------------|---------|----------------|
| Canadian Institute for Health Information (CIHI)                  | 4       | 0              |
| Canadian Agency for Drugs and Technologies in Health (CADTH)      | 10      | 3              |
| Canadian Medical Association (CMA) Infobase                       | 0       | 0              |
| National Institute for Health and Care Excellence (NICE) Guidance | 7       | 0              |
| National Guideline Clearinghouse                                  | 1       | 0              |

Date: 03.08.21

Keywords: dual use, dual use of e-cigarette and cigarette, tobacco cessation for dual users of e-cigarette and cigarette

| Database                                                          | Results | Post-screening |
|-------------------------------------------------------------------|---------|----------------|
| Canadian Institute for Health Information (CIHI)                  | 2       | 0              |
| Canadian Agency for Drugs and Technologies in Health (CADTH)      | 1       | 0              |
| Canadian Medical Association (CMA) Infobase                       | 0       | 0              |
| National Institute for Health and Care Excellence (NICE) Guidance | 5       | 0              |
| National Guideline Clearinghouse                                  | 2       | 0              |
