# Supplementary material for: Scoping review of guidance on cessation interventions for electronic cigarettes and dual electronic and combustible cigarettes use
Source: PubMed Central journal article supplement — CMAJ Open. 2023 Apr 18;11(2):E336–44. doi: 10.9778/cmajo.20210325 (PMC10118292; doi:10.9778/cmajo.20210325), 2023-04-18
Supplement: open-2021-0325-3-at.pdf [file open-2021-0325-3-at.pdf]

Scoping review of guidance on cessation interventions for electronic cigarettes and dual electronic and combustible cigarettes use.

**Appendix 3. Quality assessment of included studies using JBI critical appraisal tools**

|                                  | Critical appraisal tools                                                                                 | Substance Abuse and Mental Health Services Administration, 2020 <sup>50</sup> | American Academy of Pediatrics, 2019 <sup>52</sup> | Gonzalvo et al., 2016 <sup>55</sup> | Berg et al, 2021 <sup>56</sup> | Sahr et al, 2020 <sup>58</sup> | Silver et al, 2016 <sup>59</sup> | Hadland & Chadi, 2020 <sup>53</sup> | Graham et al, 2020 <sup>48</sup> | Graham et al., 2021 <sup>49</sup> | Sikka et al., 2021 <sup>57</sup> | Chadi et al., 2021 <sup>54</sup> | Health Canada, 2021 <sup>60</sup> |
|----------------------------------|----------------------------------------------------------------------------------------------------------|-------------------------------------------------------------------------------|----------------------------------------------------|-------------------------------------|--------------------------------|--------------------------------|----------------------------------|-------------------------------------|----------------------------------|-----------------------------------|----------------------------------|----------------------------------|-----------------------------------|
| JBI CA tool for text and opinion |                                                                                                          |                                                                               |                                                    |                                     |                                |                                |                                  |                                     |                                  |                                   |                                  |                                  |                                   |
| 1.                               | Is the source of the opinion clearly identified?                                                         | Y                                                                             | Y                                                  | Y                                   | Y                              |                                |                                  | Y                                   |                                  |                                   |                                  | Y                                |                                   |
| 2.                               | Does the source of opinion have standing in the field of expertise?                                      | Y                                                                             | Y                                                  | Y                                   | Y                              |                                |                                  | Y                                   |                                  |                                   |                                  | Y                                |                                   |
| 3.                               | Are the interests of the relevant population the central focus of the opinion?                           | Y                                                                             | Y                                                  | Y                                   | Y                              |                                |                                  | Y                                   |                                  |                                   |                                  | Y                                |                                   |
| 4.                               | Is the stated position the result of an analytical process, and is there logic in the opinion expressed? | Y                                                                             | Y                                                  | UC                                  | Y                              |                                |                                  | Y                                   |                                  |                                   |                                  | Y                                |                                   |
| 5.                               | Is there reference to the extant literature?                                                             | Y                                                                             | N                                                  | N                                   | Y                              |                                |                                  | Y                                   |                                  |                                   |                                  | Y                                |                                   |
| 6.                               | Is any incongruence with the literature/sources logically defended?                                      | Y                                                                             | Y                                                  | N                                   | Y                              |                                |                                  | N                                   |                                  |                                   |                                  | N                                |                                   |
| JBI CA tool for case reports     |                                                                                                          |                                                                               |                                                    |                                     |                                |                                |                                  |                                     |                                  |                                   |                                  |                                  |                                   |
| 1.                               | Were patient's demographic characteristics clearly described?                                            |                                                                               |                                                    |                                     |                                | Y                              | Y                                |                                     |                                  |                                   |                                  |                                  |                                   |
| 2.                               | Was the patient's history clearly described and presented as a timeline?                                 |                                                                               |                                                    |                                     |                                | Y                              | Y                                |                                     |                                  |                                   |                                  |                                  |                                   |
| 3.                               | Was the current clinical condition of the patient on presentation clearly described?                     |                                                                               |                                                    |                                     |                                | Y                              | Y                                |                                     |                                  |                                   |                                  |                                  |                                   |
| 4.                               | Were diagnostic tests or assessment methods and the results clearly described?                           |                                                                               |                                                    |                                     |                                | Y                              | UC                               |                                     |                                  |                                   |                                  |                                  |                                   |

Scoping review of guidance on cessation interventions for electronic cigarettes and dual electronic and combustible cigarettes use.

|                                          |                                                                                                                                          |  |  |  |  |   |    |  |    |  |  |  |  |
|------------------------------------------|------------------------------------------------------------------------------------------------------------------------------------------|--|--|--|--|---|----|--|----|--|--|--|--|
| 5.                                       | Was the intervention(s) or treatment procedure(s) clearly described?                                                                     |  |  |  |  | Y | UC |  |    |  |  |  |  |
| 6.                                       | Was the post-intervention clinical condition clearly described?                                                                          |  |  |  |  | Y | Y  |  |    |  |  |  |  |
| 7.                                       | Were adverse events (harms) or unanticipated events identified and described?                                                            |  |  |  |  | Y | N  |  |    |  |  |  |  |
| 8.                                       | Does the case report provide takeaway lessons?                                                                                           |  |  |  |  | Y | Y  |  |    |  |  |  |  |
| JBI CA tool for quasi-experimental study |                                                                                                                                          |  |  |  |  |   |    |  |    |  |  |  |  |
| 1.                                       | Is it clear in the study what is the 'cause' and what is the 'effect' (i.e. there is no confusion about which variable comes first)?     |  |  |  |  |   |    |  | Y  |  |  |  |  |
| 2.                                       | Were the participants included in any comparisons similar?                                                                               |  |  |  |  |   |    |  | Y  |  |  |  |  |
| 3.                                       | Were the participants included in any comparisons receiving similar treatment/care, other than the exposure or intervention of interest? |  |  |  |  |   |    |  | UC |  |  |  |  |
| 4.                                       | Was there a control group?                                                                                                               |  |  |  |  |   |    |  | N  |  |  |  |  |
| 5.                                       | Were there multiple measurements of the outcome both pre and post the intervention/exposure?                                             |  |  |  |  |   |    |  | Y  |  |  |  |  |
| 6.                                       | Was follow up complete and if not, were differences between groups in terms of their follow up adequately described and analyzed?        |  |  |  |  |   |    |  | N  |  |  |  |  |
| 7.                                       | Were the outcomes of participants included in any                                                                                        |  |  |  |  |   |    |  | Y  |  |  |  |  |

Scoping review of guidance on cessation interventions for electronic cigarettes and dual electronic and combustible cigarettes use.

|                      |                                                                                                                                   |  |  |  |  |  |  |  |    |    |  |  |  |
|----------------------|-----------------------------------------------------------------------------------------------------------------------------------|--|--|--|--|--|--|--|----|----|--|--|--|
|                      | comparisons measured in the same way?                                                                                             |  |  |  |  |  |  |  |    |    |  |  |  |
| 8.                   | Were outcomes measured in a reliable way?                                                                                         |  |  |  |  |  |  |  | UC |    |  |  |  |
| 9.                   | Was appropriate statistical analysis used?                                                                                        |  |  |  |  |  |  |  | Y  |    |  |  |  |
| JBI CA tool for RCTs |                                                                                                                                   |  |  |  |  |  |  |  |    |    |  |  |  |
| 1.                   | Was true randomization used for assignment of participants to treatment groups?                                                   |  |  |  |  |  |  |  |    | Y  |  |  |  |
| 2.                   | Was allocation to treatment groups concealed?                                                                                     |  |  |  |  |  |  |  |    | Y  |  |  |  |
| 3.                   | Were treatment groups similar at the baseline?                                                                                    |  |  |  |  |  |  |  |    | Y  |  |  |  |
| 4.                   | Were participants blind to treatment assignment?                                                                                  |  |  |  |  |  |  |  |    | Y  |  |  |  |
| 5.                   | Were those delivering treatment blind to treatment assignment?                                                                    |  |  |  |  |  |  |  |    | Y  |  |  |  |
| 6.                   | Were outcomes assessors blind to treatment assignment?                                                                            |  |  |  |  |  |  |  |    | Y  |  |  |  |
| 7.                   | Were treatment groups treated identically other than the intervention of interest?                                                |  |  |  |  |  |  |  |    | UC |  |  |  |
| 8.                   | Was follow up complete and if not, were differences between groups in terms of their follow up adequately described and analyzed? |  |  |  |  |  |  |  |    | Y  |  |  |  |
| 9.                   | Were participants analyzed in the groups to which they were randomized?                                                           |  |  |  |  |  |  |  |    | Y  |  |  |  |
| 10.                  | Were outcomes measured in the same way for treatment groups?                                                                      |  |  |  |  |  |  |  |    | Y  |  |  |  |
| 11.                  | Were outcomes measured in a reliable way?                                                                                         |  |  |  |  |  |  |  |    | NA |  |  |  |

Scoping review of guidance on cessation interventions for electronic cigarettes and dual electronic and combustible cigarettes use.

|                             |                                                                                                                                                                                       |  |  |  |  |  |  |  |  |   |   |  |  |
|-----------------------------|---------------------------------------------------------------------------------------------------------------------------------------------------------------------------------------|--|--|--|--|--|--|--|--|---|---|--|--|
| 12.                         | Was appropriate statistical analysis used?                                                                                                                                            |  |  |  |  |  |  |  |  | Y |   |  |  |
| 13.                         | Was the trial design appropriate, and any deviations from the standard RCT design (individual randomization, parallel groups) accounted for in the conduct and analysis of the trial? |  |  |  |  |  |  |  |  | Y |   |  |  |
| JBI CA tool for case series |                                                                                                                                                                                       |  |  |  |  |  |  |  |  |   |   |  |  |
| 1.                          | Were there clear criteria for inclusion in the case series?                                                                                                                           |  |  |  |  |  |  |  |  |   | Y |  |  |
| 2.                          | Was the condition measured in a standard, reliable way for all participants included in the case series?                                                                              |  |  |  |  |  |  |  |  |   | Y |  |  |
| 3.                          | Were valid methods used for identification of the condition for all participants included in the case series?                                                                         |  |  |  |  |  |  |  |  |   | N |  |  |
| 4.                          | Did the case series have consecutive inclusion of participants?                                                                                                                       |  |  |  |  |  |  |  |  |   | Y |  |  |
| 5.                          | Did the case series have complete inclusion of participants?                                                                                                                          |  |  |  |  |  |  |  |  |   | Y |  |  |
| 6.                          | Was there clear reporting of the demographics of the participants in the study?                                                                                                       |  |  |  |  |  |  |  |  |   | Y |  |  |
| 7.                          | Was there clear reporting of clinical information of the participants?                                                                                                                |  |  |  |  |  |  |  |  |   | Y |  |  |
| 8.                          | Were the outcomes or follow up results of cases clearly reported?                                                                                                                     |  |  |  |  |  |  |  |  |   | Y |  |  |
| 9.                          | Was there clear reporting of the presenting site(s)/clinic(s) demographic information?                                                                                                |  |  |  |  |  |  |  |  |   | Y |  |  |

Scoping review of guidance on cessation interventions for electronic cigarettes and dual electronic and combustible cigarettes use.

|                                      |                                                                                                                                                 |  |  |  |  |  |  |  |  |  |  |    |  |    |
|--------------------------------------|-------------------------------------------------------------------------------------------------------------------------------------------------|--|--|--|--|--|--|--|--|--|--|----|--|----|
| 10.                                  | Was statistical analysis appropriate?                                                                                                           |  |  |  |  |  |  |  |  |  |  | NA |  |    |
| JMI CA tool for qualitative research |                                                                                                                                                 |  |  |  |  |  |  |  |  |  |  |    |  |    |
| 1.                                   | Is there congruity between the stated philosophical perspective and the research methodology?                                                   |  |  |  |  |  |  |  |  |  |  |    |  | Y  |
| 2.                                   | Is there congruity between the research methodology and the research question or objectives?                                                    |  |  |  |  |  |  |  |  |  |  |    |  | Y  |
| 3.                                   | Is there congruity between the research methodology and the methods used to collect data?                                                       |  |  |  |  |  |  |  |  |  |  |    |  | Y  |
| 4.                                   | Is there congruity between the research methodology and the representation and analysis of data?                                                |  |  |  |  |  |  |  |  |  |  |    |  | Y  |
| 5.                                   | Is there congruity between the research methodology and the interpretation of results?                                                          |  |  |  |  |  |  |  |  |  |  |    |  | Y  |
| 6.                                   | Is there a statement locating the researcher culturally or theoretically?                                                                       |  |  |  |  |  |  |  |  |  |  |    |  | N  |
| 7.                                   | Is the influence of the researcher on the research, and vice- versa, addressed?                                                                 |  |  |  |  |  |  |  |  |  |  |    |  | Y  |
| 8.                                   | Are participants, and their voices, adequately represented?                                                                                     |  |  |  |  |  |  |  |  |  |  |    |  | Y  |
| 9.                                   | Is the research ethical according to current criteria or, for recent studies, and is there evidence of ethical approval by an appropriate body? |  |  |  |  |  |  |  |  |  |  |    |  | UC |

Scoping review of guidance on cessation interventions for electronic cigarettes and dual electronic and combustible cigarettes use.

|                                    |                                                                                                         |     |     |     |     |     |     |     |     |       |      |     |      |
|------------------------------------|---------------------------------------------------------------------------------------------------------|-----|-----|-----|-----|-----|-----|-----|-----|-------|------|-----|------|
| 10.                                | Do the conclusions drawn in the research report flow from the analysis, or interpretation, of the data? |     |     |     |     |     |     |     |     |       |      |     | Y    |
| Total (obtained score/total score) |                                                                                                         | 6/6 | 5/6 | 3/6 | 6/6 | 8/8 | 5/8 | 5/6 | 5/9 | 11/13 | 8/10 | 5/6 | 8/10 |
| Percentage (%)                     |                                                                                                         | 100 | 83  | 50  | 100 | 100 | 62  | 83  | 55  | 85    | 80   | 83  | 80   |

Abbreviations: JBI, Joana Briggs Institute; N, No; NA, Not applicable; UC, Unclear; Y, Yes.
